# Supplementary material for: Identification of Four Distinct Phylogenetic Groups in Flavobacterium columnare With Fish Host Associations
Source: Front Microbiol. 2018 Mar 13;9:452. doi: 10.3389/fmicb.2018.00452 (PMC5859164; doi:10.3389/fmicb.2018.00452)
Supplement: Supplementary file 1 [file Table_1.XLSX]

## Sheet: 16S rRNA gene sequences
Supplementary Table 1│Historical data on Flavobacterium columnare isolates included in the 16S rRNA phylogeny including 16S rRNA Accession number, Isolate designation, country of origin, species of fish, fish family, genetic group, and available references.
16S rRNA Accession	Isolate	Country of Origin	Species of Fish	Fish Family	Genetic Group	Reference (full citation under 'References' tab)
KR013058	FCP	China	yellowhead catfish, Tachysurus fulvidraco	Bagridae	1	―
JX287792	T7L.06.B.COS.MI.W.Kidney.D	USA (MI)	coho salmon, Oncorhynchus kisutch	Salmonidae	1	Loch et al. (2013)
JX287814	T52L.08.B.CHS.LM.W.Kidney.D	USA (MI)	chinook salmon, Oncorhynchus tshawytscha	Salmonidae	1	Loch et al. (2013)
JX287830	T79L.09.SMB.W.Gill.D.M	USA (MI)	smallmouth bass, Micropterus dolomieu	Centrarchidae	1	Loch et al. (2013)
JX287831	T89L.09.P.MUS.NO.H.Kidney.D.M	USA (MI)	muskellunge, Esox masquinongy	Esocidae	1	Loch et al. (2013)
JX287832	T90L.09.P.MUS.NO.H.Kidney.D.M	USA (MI)	muskellunge, Esox masquinongy	Esocidae	1	Loch et al. (2013)
JX287846	T109L.09.B.COS.MI.W.Kidney.N	USA (MI)	chinook salmon, Oncorhynchus tshawytscha	Salmonidae	1	Loch et al. (2013)
JX287847	T110L.09.B.COS.MI.W.Kidney.N	USA (MI)	chinook salmon, Oncorhynchus tshawytscha	Salmonidae	1	Loch et al. (2013)
JX287848	T111L.09.B.CHS.MI.SRW.W.Kidney.N	USA (MI)	chinook salmon, Oncorhynchus tshawytscha	Salmonidae	1	Loch et al. (2013)
JX287849	T113L.09.B.CHS.MI.SRW.W.Kidney.N	USA (MI)	chinook salmon, Oncorhynchus tshawytscha	Salmonidae	1	Loch et al. (2013)
JX287850	T116L.09.B.CHS.MI.SRW.W.Kidney.D	USA (MI)	chinook salmon, Oncorhynchus tshawytscha	Salmonidae	1	Loch et al. (2013)
JX657055	ICM USA1	Not known	Not known	Not known	1	―
GU296112	XF	China	grass carp, Ctenopharyngodon idella	Cyprinidae	1	―
HM480317	WIF38	India	well-water irrigated field soil	Environment	1	Tripathi et al. (2014)
HM235501	LM-01-Fc	Chile	rainbow trout, Oncorhynchus mykiss	Salmonidae	1	Avendaño-Herrera et al. (2011)
HM235502	LM-02-Fc	Chile	coho salmon, Oncorhynchus kisutch	Salmonidae	1	Avendaño-Herrera et al. (2011)
EU395790	LN1331	China	grass carp, Ctenopharyngodon idella	Cyprinidae	1	Li et al. (2010)
EU395794	G18	China	grass carp, Ctenopharyngodon idella	Cyprinidae	1	Li et al. (2010)
EU395796	G4	China	grass carp, Ctenopharyngodon idella	Cyprinidae	1	Li et al. (2010)
EU395797	C5	China	Chinese high-fin banded shark, Myxocyprinus asiaticus	Catostomidae	1	Wang et al. (2010)
EU395799	X1	China	Chinese sturgeon, Acipenser sinensis	Acipenseridae	1	Li et al. (2010)
EU395800	A8	China	grass carp, Ctenopharyngodon idella	Cyprinidae	1	Li et al. (2010)
EU395802	QJH-1	China	channel catfish, Ictalurus punctatus	Ictaluridae	1	Li et al. (2010)
DQ005502	Coho-92	USA	coho salmon, Oncorhynchus kisutch	Salmonidae	1	Schneck and Caslake (2006)
DQ005503	Steelhead-91	USA	steelhead, Oncorhynchus mykiss	Salmonidae	1	Schneck and Caslake (2006)
DQ005504	Sockeye-93	USA	sockeye salmon, Oncorhynchus nerka	Salmonidae	1	Schneck and Caslake (2006)
DQ005505	Kokanee-94	USA	kokanee salmon, Oncorhynchus nerka	Salmonidae	1	Schneck and Caslake (2006)
DQ005506	Steelhead-96	USA	steelhead, Oncorhynchus mykiss	Salmonidae	1	Schneck and Caslake (2006)
DQ005507	Goldfish-98	USA	goldfish, Carassius auratus	Cyprinidae	1	Schneck and Caslake (2006)
DQ005510	Fathead Minnow-98	USA (NY)	fathead minnow, Pimephales promelas	Cyprinidae	1	Schneck and Caslake (2006)
AJ831824	3294/95	Finland	trout	Salmonidae	1	Suomalainen et al. (2006)
AJ831825	8128/97	Finland	arctic charr, Salvelinus alpinus	Salmonidae	1	Suomalainen et al. (2006)
AJ831826	8239/97	Finland	rainbow trout, Oncorhynchus mykiss	Salmonidae	1	Suomalainen et al. (2006)
AJ831827	1397/00	Finland	rainbow trout, Oncorhynchus mykiss	Salmonidae	1	Suomalainen et al. (2006)
AJ831828	KE/02	Finland	salmon	Salmonidae	1	Suomalainen et al. (2006)
AJ831829	OS/03	Finland	salmon	Salmonidae	1	Suomalainen et al. (2006)
AJ831830	Htan5/03	Finland	rainbow trout, Oncorhynchus mykiss	Salmonidae	1	Suomalainen et al. (2006)
AY095342	No strain provided	Not known	Not known	Not known	1	―
AB078047	ATCC 23463	USA (WA)	chinook salmon, Oncorhynchus tshawytscha	Salmonidae	1	Nakagawa et al. (2002)
AB023660	ATCC 49513	France	black bullhead, Ameiurus melas	Ictaluridae	1	Triyanto and Wakabayashi (1999)
AB010952	FK 401	Japan	Japanese eel, Anguilla japonica	Anguillidae	1	Triyanto and Wakabayashi (1999)
MG516957	RCO2503	Singapore	red cap oranda goldfish, Carassius auratus	Cyprinidae	1	This paper
MG516958	S15-63	USA (MS)	channel catfish, Ictalurus punctatus	Ictaluridae	1	This paper
MG516950	ARS-15-4	USA (AL)	bluegill, Lepomis macrochirus	Centrarchidae	1	This paper
MG516944	14-051	USA (WY)	bluehead sucker, Catostomus discobolus	Catostomidae	1	This paper
MG516951	ARS-DRB-1-10	USA (AL)	channel catfish, Ictalurus punctatus	Ictaluridae	1	This paper
MG516963	Israel	Israel	common carp, Cyprinus carpio	Cyprinidae	1	This paper
MG516964	ALG-03-063	USA (AL)	channel catfish, Ictalurus punctatus	Ictaluridae	1	This paper
MG516966	IA-S-4	USA (IA)	walleye, Sander vitreus	Percidae	1	This paper
FCOL_RS00670	ATCC 49512	France	brown trout, Salmo trutta	Salmonidae	1	Tekedar et al. (2012)
BZL53_RS00005	CSF-298-10	USA (ID)	rainbow trout, Oncorhynchus mykiss	Salmonidae	1	Evenhuis et al. (2017)
BU993_RS00110	TC 1691	China	river water sample	Environment	1	―
Pf1_RS06420	Pf1	China	yellowhead catfish, Tachysurus fulvidraco	Bagridae	1	Zhang et al. (2016)
MG516965	F4-HK	USA (IN)	yellow perch, Perca flavescens	Percidae	1	This paper
KX866408	R3GS	India	rohu, Labeo rohita	Cyprinidae	2	―
KU851952	WBUAFS-SGM4	India	walking catfish, Clarias batrachus	Clariidae	2	―
KR080245	CF2	Thailand	striped catfish, Pangasianodon hypophthalmus	Pangasiidae	2	Dong et al. (2015b)
KR080246	CF3	Thailand	striped catfish, Pangasianodon hypophthalmus	Pangasiidae	2	Dong et al. (2015b)
KF274042	CUVET1231	Vietnam	striped catfish, Pangasianodon hypophthalmus	Pangasiidae	2	Dong et al. (2015a)
KF274043	CUVET1232	Vietnam	striped catfish, Pangasianodon hypophthalmus	Pangasiidae	2	Dong et al. (2015a)
JN825736	RDC-1	India	major carp, Catla catla	Cyprinidae	2	Kumar Verma and Rathore (2013)
EU402411	HJ	China	Chinese longsnout catfish, Leiocassis longirostris	Bagridae	2	Wang et al. (2010)
EU395791	Z0	China	mandarin fish, Siniperca chuatsi	Percichthyidae	2	Li et al. (2010)
EU395792	Z4	China	mandarin fish, Siniperca chuatsi	Percichthyidae	2	Li et al. (2010)
EU395793	Z13	China	mandarin fish, Siniperca chuatsi	Percichthyidae	2	Li et al. (2010)
EU395795	Z6	China	mandarin fish, Siniperca chuatsi	Percichthyidae	2	Li et al. (2010)
EU395798	B2	China	koi carp, Cryprinus carpio	Cyprinidae	2	Li et al. (2010)
EU395801	H10	China	grass carp, Ctenopharyngodon idella	Cyprinidae	2	Li et al. (2010)
EU395803	QJH-2	China	channel catfish, Ictalurus punctatus	Ictaluridae	2	Li et al. (2010)
AY842900	LV339-01	USA (AR)	channel catfish, Ictalurus punctatus	Ictaluridae	2	Darwish and Ismaiel (2005)
AY842901	Ga-6-93	USA (GA)	common carp, Cyprinus carpio	Cyprinidae	2	Darwish and Ismaiel (2005)
AB016515	EK-28 (= IAM 14820	Japan	Japanese eel, Anguilla japonica	Anguillidae	2	Triyanto and Wakabayashi (1999)
AB015480	LP 8	Japan	Loach, species not known	Order, Cypriniformes	2	Triyanto and Wakabayashi (1999)
MG516960	TI2429	Thailand	tilapia, Oreochromis sp.	Cichlidae	2	This paper
MG516945	A2502	Singapore	arowana, species not known	Osteoglossidae	2	This paper
MG516955	EE923	China	eel, species not known	Anguillidae	2	This paper
MG516954	CC1351	Indonesia	common carp, Cyprinus carpio	Cyprinidae	2	This paper
MG516971	ALG-00-530	USA (AL)	channel catfish, Ictalurus punctatus	Ictaluridae	2	This paper
MG516972	AL-02-36	USA (AL)	largemouth bass, Micropterus salmoides	Centrarchidae	2	This paper
MG516973	MS-02-475	USA (MS)	channel catfish, Ictalurus punctatus	Ictaluridae	2	This paper
AX766_02970	C#2	Not known	Not known	Not known	2	Bartelme et al. (2016)
AWN65_RS02370	94-081	USA (MS)	channel catfish, Ictalurus punctatus	Ictaluridae	2	Kumru et al. (2016)
BWK60_13005	CF1	Thailand	striped catfish, Pangasianodon hypophthalmus	Pangasiidae	2	Kayansamruaj et al. (2017)
BWK63_13940	1362	Thailand	red tilapia, Oreochromis sp.	Cichlidae	2	Kayansamruaj et al. (2017)
MG516970	PT-14-00-151	USA (MS)	channel catfish, Ictalurus punctatus	Ictaluridae	2	This paper
MG516974	FBCC-CC-12K	USA (FL)	channel catfish, Ictalurus punctatus	Ictaluridae	2	This paper
DQ005509	Catfish-94	USA	catfish, species not known	Ictaluridae	3	Schneck and Caslake (2006)
DQ005511	Baitfish-97	USA	baitfish, Notropis sp.	Cyprinidae	3	Schneck and Caslake (2006)
AY842899	AU-98-24	USA (AL)	channel catfish, Ictalurus punctatus	Ictaluridae	3	Darwish and Ismaiel (2005)
AB015481	PH-97028 (= IAM 14821	Japan	ayu, Plecoglossus altivelis	Plecoglossidae	3	Triyanto and Wakabayashi (1999)
MG516959	TI2063	Africa	tilapia, Oreochromis sp.	Cichlidae	3	This paper
MG516956	Grizzle	USA (AL)	channel catfish, Ictalurus punctatus	Ictaluridae	3	This paper
MG516952	AU-LMB-08-5	USA (AL)	largemouth bass, Micropterus salmoides	Centrarchidae	3	This paper
MG516949	ARS-15-12	USA (FL)	Nile tilapia, Oreochromis niloticus	Cichlidae	3	This paper
MG516962	TN-3-2012	USA (AL)	Nile tilapia, Oreochromis niloticus	Cichlidae	3	This paper
MG516948	ALM-05-69	USA (AL)	freshwater drum, Aplodinotus grunniens	Sciaenidae	3	This paper
MG516947	ALM-05-140	USA (AL)	channel catfish, Ictalurus punctatus	Ictaluridae	3	This paper
MG516946	ALM-05-111	USA (AL)	threadfin shad, Dorosoma petenense	Clupeidae	3	This paper
BWK59_13545	1215	Thailand	red tilapia, Oreochromis sp.	Cichlidae	3	Kayansamruaj et al. (2017)
MG516967	90-106	USA (MS)	channel catfish, Ictalurus punctatus	Ictaluridae	3	This paper
MG516968	GA-02-14	USA (GA)	rainbow trout, Oncorhynchus mykiss	Salmonidae	3	This paper
MG516969	ARS-1	USA (AL)	channel catfish, Ictalurus punctatus	Ictaluridae	3	This paper
KP899506	NK-Fc02	Thailand	Nile tilapia, Oreochromis niloticus	Cichlidae	4	Dong et al. (2015c)
KP899507	NK-Fc03	Thailand	Nile tilapia, Oreochromis niloticus	Cichlidae	4	Dong et al. (2015c)
KP899508	NK-Fc04	Thailand	Nile tilapia, Oreochromis niloticus	Cichlidae	4	Dong et al. (2015c)
KP899509	NK-Fc05	Thailand	Nile tilapia, Oreochromis niloticus	Cichlidae	4	Dong et al. (2015c)
KP899510	NK-Fc06	Thailand	Nile tilapia, Oreochromis niloticus	Cichlidae	4	Dong et al. (2015c)
KP899511	NK-Fc07	Thailand	Nile tilapia, Oreochromis niloticus	Cichlidae	4	Dong et al. (2015c)
KP899512	NK-Fc08	Thailand	Nile tilapia, Oreochromis niloticus	Cichlidae	4	Dong et al. (2015c)
KP899513	NK-Fc09	Thailand	Nile tilapia, Oreochromis niloticus	Cichlidae	4	Dong et al. (2015c)
KP899514	NK-Fc10	Thailand	Nile tilapia, Oreochromis niloticus	Cichlidae	4	Dong et al. (2015c)
KF774289	CUVET1345	Thailand	hybrid red tilapia, Oreochromis sp.	Cichlidae	4	Dong et al. (2015a)
KF774290	CUVET1346	Thailand	hybrid red tilapia, Oreochromis sp.	Cichlidae	4	Dong et al. (2015a)
KF774291	CUVET1350	Thailand	hybrid red tilapia, Oreochromis sp.	Cichlidae	4	Dong et al. (2015a)
KF274033	CUVET1201	Thailand	hybrid red tilapia, Oreochromis sp.	Cichlidae	4	Dong et al. (2015a)
KF274034	CUVET1202	Thailand	hybrid red tilapia, Oreochromis sp.	Cichlidae	4	Dong et al. (2015a)
KF274035	CUVET1203	Thailand	hybrid red tilapia, Oreochromis sp.	Cichlidae	4	Dong et al. (2015a)
KF274036	CUVET1204	Thailand	hybrid red tilapia, Oreochromis sp.	Cichlidae	4	Dong et al. (2015a)
KF274037	CUVET1212	Thailand	hybrid red tilapia, Oreochromis sp.	Cichlidae	4	Dong et al. (2015a)
KF274038	CUVET1213	Thailand	hybrid red tilapia, Oreochromis sp.	Cichlidae	4	Dong et al. (2015a)
KF274041	CUVET1221	Thailand	koi carp, Cryprinus carpio	Cyprinidae	4	Dong et al. (2015a)
KF274044	CUVET1336	Thailand	hybrid red tilapia, Oreochromis sp.	Cichlidae	4	Dong et al. (2015a)
KF274045	CUVET1338	Thailand	hybrid red tilapia, Oreochromis sp.	Cichlidae	4	Dong et al. (2015a)
KF274046	CUVET1340	Thailand	hybrid red tilapia, Oreochromis sp.	Cichlidae	4	Dong et al. (2015a)
KF274047	CUVET1341	Thailand	hybrid red tilapia, Oreochromis sp.	Cichlidae	4	Dong et al. (2015a)
KF274048	CUVET1343	Thailand	hybrid red tilapia, Oreochromis sp.	Cichlidae	4	Dong et al. (2015a)
KF274049	CUVET1344	Thailand	hybrid red tilapia, Oreochromis sp.	Cichlidae	4	Dong et al. (2015a)
MG516953	BZ-5-02	Brazil	Nile tilapia, Oreochromis niloticus	Cichlidae	4	This paper
KX711895	TI472	Malaysia	tilapia, Oreochromis sp.	Cichlidae	4	LaFrentz et al. (2014)
MG516961	TI982	Vietnam	tilapia, Oreochromis sp.	Cichlidae	4	This paper
KX711900	TI2056	China	tilapia, Oreochromis sp.	Cichlidae	4	LaFrentz et al. (2014)
KX711898	TI1677	Ecuador	tilapia, Oreochromis sp.	Cichlidae	4	LaFrentz et al. (2014)
KX711897	TI1371	Indonesia	tilapia, Oreochromis sp.	Cichlidae	4	LaFrentz et al. (2014)
KX711896	TI1354B	Indonesia	tilapia, Oreochromis sp.	Cichlidae	4	LaFrentz et al. (2014)
KX711899	TI1690	Honduras	tilapia, Oreochromis sp.	Cichlidae	4	LaFrentz et al. (2014)
KX711894	Costa Rica 04-02-TN	Costa Rica	tilapia, Oreochromis sp.	Cichlidae	4	LaFrentz et al. (2014)
MG516975	BZ-1-02	Brazil	Nile tilapia, Oreochromis niloticus	Cichlidae	4	This paper
BWK62_15295	1214	Thailand	red tilapia, Oreochromis sp.	Cichlidae	4	Kayansamruaj et al. (2017)
BWG23_14835	NK01	Thailand	Nile tilapia, Oreochromis niloticus	Cichlidae	4	Kayansamruaj et al. (2017)
KJ190173	CUVET1216	Thailand	red tilapia, Oreochromis sp.	Cichlidae	Not known	Dong et al. (2015a)

## Sheet: References
Avendaño-Herrera, R., Gherardelli, V., Olmos, P., Godoy, M.G., Heisinger, A., and Fernandez, J. (2011). Flavobacterium columnare associated with mortality of salmonids farmed in Chile: a case report of two outbreaks. Bulletin of the European Association of Fish Pathologists 31(1), 36-44
Bartelme, R.P., Newton, R.J., Zhu, Y., Li, N., LaFrentz, B.R., and McBride, M.J. (2016). Complete genome sequence of the fish pathogen Flavobacterium columnare strain C#2. Genome Announcements 4(3). doi: 10.1128/genomeA.00624-16.
Darwish, A.M., and Ismaiel, A.A. (2005). Genetic diversity of Flavobacterium columnare examined by restriction fragment length polymorphism and sequencing of the 16S ribosomal RNA gene and the 16S-23S rDNA spacer. Molecular and Cellular Probes 19(4), 267-274.
Dong, H.T., LaFrentz, B., Pirarat, N., and Rodkhum, C. (2015a). Phenotypic characterization and genetic diversity of Flavobacterium columnare isolated from red tilapia, Oreochromis sp., in Thailand. Journal of Fish Diseases 38(10), 901-913. doi: 10.1111/jfd.12304.
Dong, H.T., Nguyen, V.V., Phiwsaiya, K., Gangnonngiw, W., Withyachumnarnkul, B., Rodkhum, C., et al. (2015b). Concurrent infections of Flavobacterium columnare and Edwardsiella ictaluri in striped catfish, Pangasianodon hypophthalmus in Thailand. Aquaculture 448(Supplement C), 142-150. doi: https://doi.org/10.1016/j.aquaculture.2015.05.046.
Dong, H.T., Nguyen, V.V., Phiwsaiya, K., Gangnonngiw, W., Withyachumnarnkul, B., Rodkhum, C., et al. (2015c). Concurrent infections of Flavobacterium columnare and Edwardsiella ictaluri in striped catfish, Pangasianodon hypophthalmus in Thailand. Aquaculture 448(Supplement C), 142-150. doi: https://doi.org/10.1016/j.aquaculture.2015.05.046.
Evenhuis, J.P., LaPatra, S.E., and Graf, J. (2017). Draft genome sequence of the fish pathogen Flavobacterium columnare strain CSF-298-10. Genome Announcements 5(15). doi: 10.1128/genomeA.00173-17.
Kayansamruaj, P., Dong, H.T., Hirono, I., Kondo, H., Senapin, S., and Rodkhum, C. (2017). Comparative genome analysis of fish pathogen Flavobacterium columnare reveals extensive sequence diversity within the species. Infection, Genetics and Evolution 54(Supplement C), 7-17. doi: https://doi.org/10.1016/j.meegid.2017.06.012.
Kumar Verma, D., and Rathore, G. (2013). Molecular characterization of Flavobacterium columnare isolated from a natural outbreak of columnaris disease in farmed fish, Catla catla from India. The Journal of General and Applied Microbiology 59(6), 417-424. doi: 10.2323/jgam.59.417.
Kumru, S., Tekedar, H.C., Waldbieser, G.C., Karsi, A., and Lawrence, M.L. (2016). Genome sequence of the fish pathogen Flavobacterium columnare genomovar II strain 94-081. Genome Announcements 4(3). doi: 10.1128/genomeA.00430-16.
Li, N., Zhang, J., Zhang, L.Q., and Nie, P. (2010). Difference in genes between a high virulence strain G4 and a low virulence strain G18 of Flavobacterium columnare by using suppression subtractive hybridization. Journal of Fish Diseases 33(5), 403-412. doi: 10.1111/j.1365-2761.2009.01132.x.
Loch, T.P., Fujimoto, M., Woodiga, S.A., Walker, E.D., Marsh, T.L., and Faisal, M. (2013). Diversity of fish-associated Flavobacteria of Michigan. Journal of Aquatic Animal Health 25(3), 149-164. doi: 10.1080/08997659.2012.758189.
Nakagawa, Y., Sakane, T., Suzuki, M., and Hatano, K. (2002). Phylogenetic structure of the genera Flexibacter, Flexithrix, and Microscilla deduced from 16S rRNA sequence analysis. The Journal of General and Applied Microbiology 48(3), 155-165. doi: 10.2323/jgam.48.155.
Schneck, J.L., and Caslake, L.F. (2006). Genetic diversity of Flavobacterium columnare isolated from fish collected from warm and cold water. Journal of Fish Diseases 29(4), 245-248. doi: 10.1111/j.1365-2761.2006.00698.x.
Suomalainen, L.-R., Kunttu, H., Valtonen, E.T., Hirvela-Koski, V., and Tiirola, M. (2006). Molecular diversity and growth features of Flavobacterium columnare strains isolated in Finland. Diseases of Aquatic Organisms 70(1-2), 55-61. doi: 10.3354/dao070055.
Tekedar, H.C., Karsi, A., Gillaspy, A.F., Dyer, D.W., Benton, N.R., Zaitshik, J., et al. (2012). Genome sequence of the fish pathogen Flavobacterium columnare ATCC 49512. Journal of Bacteriology 194(10), 2763-2764. doi: 10.1128/jb.00281-12.
Tripathi, B.M., Kumari, P., Weber, K.P., Saxena, A.K., Arora, D.K., and Kaushik, R. (2014). Influence of long term irrigation with pulp and paper mill effluent on the bacterial community structure and catabolic function in soil. Indian Journal of Microbiology 54(1), 65-73. doi: 10.1007/s12088-013-0398-8
Triyanto, and Wakabayashi, H. (1999). Genotypic diversity of strains of Flavobacterium columnare from diseased fishes. Fish Pathology 34(2), 65-71.
Wang, L.-F., Xie, H.-X., Zhang, J., Li, N., Yao, W.-J., Zhang, L.-Q., et al. (2010). Columnaris disease and genetic diversity of its bacterial pathogen Flavobacterium columnare in freshwater fish in China. ACTA HYDROBIOLOGICA SINICA 34(2), 367-377.
Zhang, Y., Nie, P., and Lin, L. (2016). Complete genome sequence of the fish pathogen Flavobacterium columnare Pf1. Genome Announcements 4(5). doi: 10.1128/genomeA.00900-16.
